# Supplementary material for: A Molecular Investigation of the Solvent Influence on Inter- and Intra-Molecular Hydrogen Bond Interaction of Linamarin
Source: MDPI journal article supplement (doi:10.3390/pr10020352), 2022-02-11
Supplement: s1 [file s1]

# A Molecular Investigation of the Solvent Influence on Inter- and Intra-molecular Hydrogen Bond Interaction of Linamarin

Lucas Paul <sup>1,2,\*</sup>, Geradius Deogratias <sup>3</sup>, Daniel M. Shadrack <sup>4</sup>, Celestin N. Mudogo <sup>5</sup>, Kelvin M. Mtei <sup>6</sup>, Revocatus L. Machunda <sup>6</sup>, Andrew S. Paluch <sup>7</sup> and Fidele Ntie-Kang <sup>8,9,\*</sup>

<sup>1</sup> Department of Materials and Energy Science and Engineering, The Nelson Mandela African Institution of Science and Technology, Arusha 23306, Tanzania

<sup>2</sup> Department of Chemistry, Dar es Salaam University College of Education, Dar es Salaam, Tanzania

<sup>3</sup> Chemistry Department, College of Natural and Applied Sciences, University of Dar es Salaam, Dar es Salaam, Tanzania; dgeradius@udsm.ac.tz

<sup>4</sup> Department of Chemistry, Faculty of Natural and Applied Sciences, St. John's University of Tanzania, Dodoma, Tanzania; mshadrack@sjut.ac.tz

<sup>5</sup> Department of Basic Sciences, School of Medicine, University of Kinshasa, Kinshasa, Democratic Republic of Congo; celestin.mudogo@unikin.ac.cd

<sup>6</sup> Department of Water and Environmental Science and Engineering, The Nelson Mandela African Institution of Science and Technology, Arusha 23306, Tanzania; kelvin.mtei@nm-aist.ac.tz (K.M.M.); revocatus.machunda@nm-aist.ac.tz (R.L.M.)

<sup>7</sup> Miami University, Department of Chemical, Paper and Biomedical Engineering, 650 E. Oxford, OH 45056, USA; paluchas@miamioh.edu

<sup>8</sup> Department of Chemistry, University of Buea, Buea, Cameroon

<sup>9</sup> Department of Pharmaceutical Chemistry, Martin-Luther University Halle-Wittenberg, 06120 Halle (Saale), Germany

\* Correspondence: lucasp@nm-aist.ac.tz (L.P.); fidele.ntie-kang@ubuea.cm (F.N.-K.)

**Table S1.** Table summarizes the number of solvents molecules and the size of PBC box.

| Solution system          | Solvents | Linamarin | Total number | Box size (nm <sup>3</sup> ) |
|--------------------------|----------|-----------|--------------|-----------------------------|
| DCM & LINAMARIN          | 191      | 1         | 192          | 24.1724                     |
| WATER(TIP4P) & LINAMARIN | 779      | 1         | 780          | 24.1724                     |
| DMSO & LINAMARIN         | 210      | 1         | 211          | 24.1724                     |
| MeOH                     | 316      | 1         | 317          | 24.1724                     |

**Table S2.** Summary of free energy contribution from each solvent.

|       | DCM                      | DMSO                     | methanol                 | water                    |
|-------|--------------------------|--------------------------|--------------------------|--------------------------|
| State | $\Delta G_{\text{solv}}$ | $\Delta G_{\text{solv}}$ | $\Delta G_{\text{solv}}$ | $\Delta G_{\text{solv}}$ |
| 0     | 0                        | 0                        | 0                        | 0                        |
| 1     | 1.499                    | 1.907                    | 1.778                    | 1.919                    |
| 2     | 3.292                    | 5.242                    | 4.446                    | 7.839                    |
| 3     | 2.798                    | 6.53                     | 4.586                    | 13.201                   |
| 4     | 1.037                    | 5.861                    | 3.486                    | 14.697                   |
| 5     | -1.415                   | 3.807                    | 1.757                    | 14.313                   |
| 6     | -4.258                   | 0.845                    | -0.377                   | 13.028                   |
| 7     | -7.355                   | -2.629                   | -2.794                   | 11.27                    |
| 8     | -10.632                  | -6.428                   | -5.423                   | 9.218                    |
| 9     | -14.045                  | -10.445                  | -8.209                   | 6.964                    |
| 10    | -17.566                  | -14.626                  | -11.113                  | 4.566                    |
| 11    | -19.32                   | -18.758                  | -14.255                  | -0.998                   |
| 12    | -21.001                  | -23.278                  | -17.965                  | -8.213                   |
| 13    | -22.682                  | -28.152                  | -22.664                  | -17.252                  |
| 14    | -24.318                  | -33.299                  | -28.869                  | -27.957                  |

|                 |         |         |         |         |
|-----------------|---------|---------|---------|---------|
| <b>Coulomb:</b> | -6.752  | -18.673 | -17.756 | -32.523 |
| <b>vdWaals:</b> | -17.566 | -14.626 | -11.113 | 4.566   |
| <b>TOTAL:</b>   | -24.318 | -33.299 | -28.869 | -27.957 |
